# Supplementary material for: Severe Fever with Thrombocytopenia Syndrome Virus Antigen Detection Using Monoclonal Antibodies to the Nucleocapsid Protein
Source: PubMed Central journal article supplement (PMC4821557; doi:10.1371/journal.pntd.0004595), 2016-04-05
Supplement: pntd.0004595.s001.pdf [file pntd.0004595.s001.pdf]

## S1 Figure

| MAb      | Reactivity of MAb with SFTSV YG1 (TCID <sub>50</sub> /100μl) |      |      |      |     |     |     |     |
|----------|--------------------------------------------------------------|------|------|------|-----|-----|-----|-----|
|          | 15653                                                        | 7827 | 3913 | 1957 | 978 | 489 | 245 | 122 |
| 9D3      | +                                                            | +    | +    | +    | -   | -   | -   | -   |
| 9D3+2D11 | +                                                            | +    | -    | -    | -   | -   | -   | -   |
