# Supplementary material for: Severe Fever with Thrombocytopenia Syndrome Virus Antigen Detection Using Monoclonal Antibodies to the Nucleocapsid Protein
Source: PubMed Central journal article supplement (PMC4821557; doi:10.1371/journal.pntd.0004595), 2016-04-05

## S2 Figure

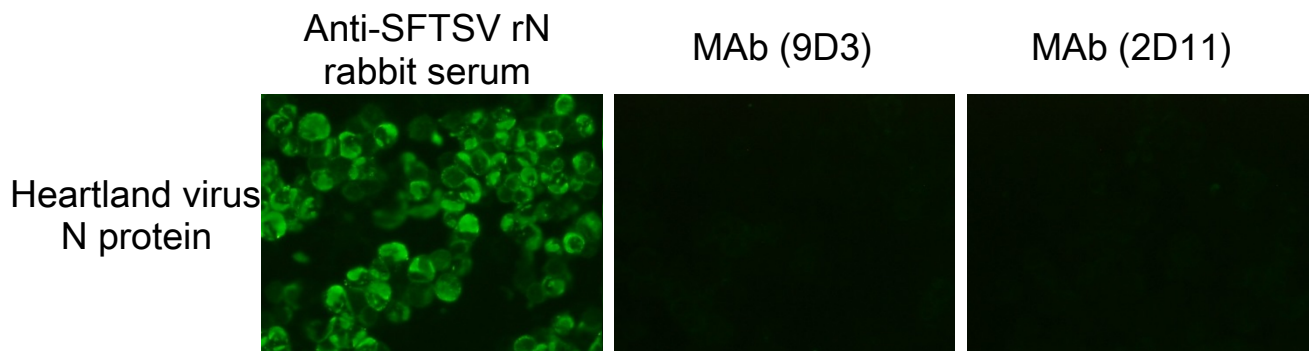

Supplement: pntd.0004595.s002.pdf [file pntd.0004595.s002.pdf]
